# Supplementary material
Source: publisher figshare collection journal article supplement (https://karger.figshare.com/articles/dataset/_/5128117)
Supplement: Supplementary file 1 [file 1]

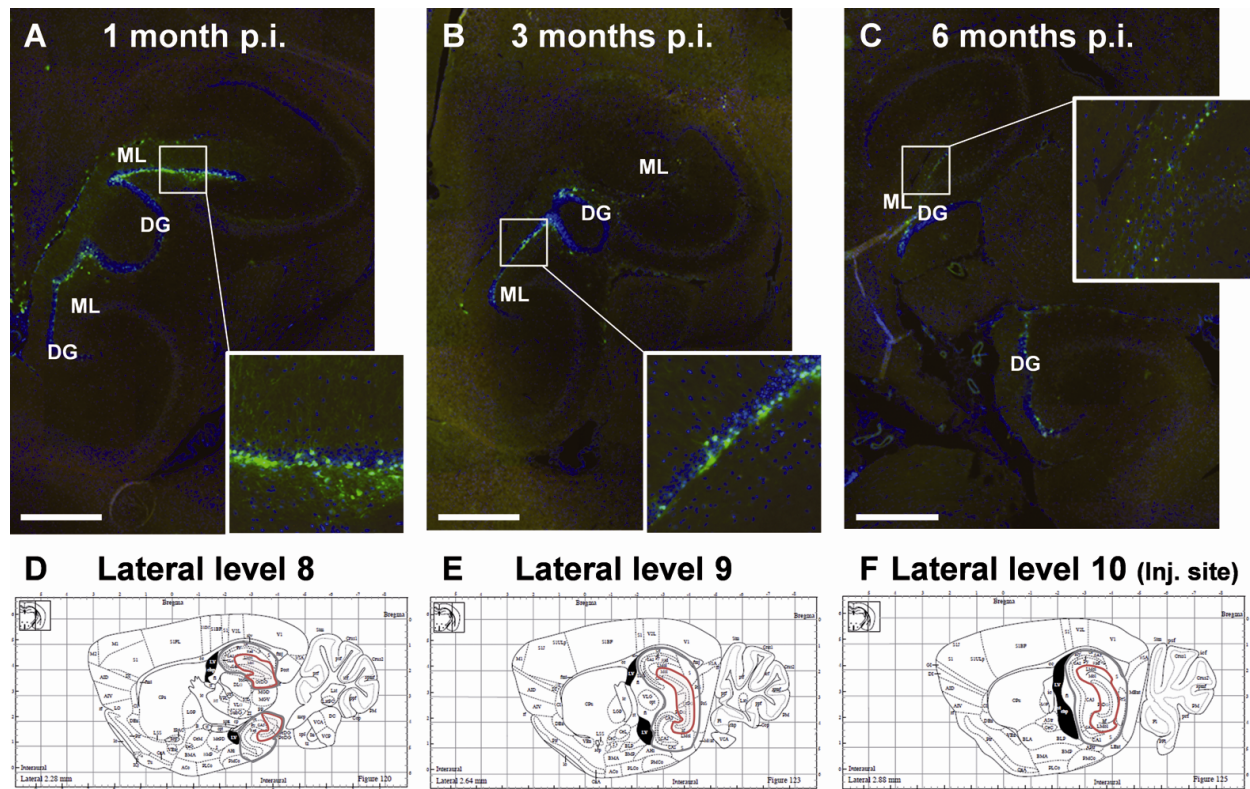

**Figure S1: Distribution of GFP expressing lentiviral particles in the murine**

**hippocampus.** Lentiviral distribution was analyzed around the injection site histologically after 1 (age 7 months; **A**), 3 (age 9 months; **B**) and 6 months (age 12 months; **C**).

Representative pictures of cryo-fixed brain slices from intrathecally injected APP<sub>SL</sub> tg animals overexpressing GFP (Titer  $7 \times 10^8$  IU/ml). Injections were placed directly in the hippocampus (coordinates:  $\pm 3$  mm lateral;  $-3.0$  mm posterior;  $1.8$ - $2.0$  mm ventral). Green: GFP; Blue: DAPI. Scale bars =  $500 \mu\text{m}$ . Histological analyses comprised three lateral brain levels: Level 8 ( $2.3$ - $2.34$  mm lateral; **D**), level 9 ( $2.6$ - $2.64$  mm lateral; **E**) and level 10 ( $2.9$ - $3.2$  mm lateral, injection site; **F**). According to the lentiviral expression pattern (**A-C**) immunohistochemical evaluations were performed region specifically for the DG and ML (**D-F**, red marked region). Schemes in (**D-F**) show the annotated region scheme with nomenclature and manual definition of the AOI (red marked region). Anatomical figures were taken from Paxinos & Franklin “The Mouse Brain Atlas”. *Abbreviations: GFP: green fluorescent protein, IU/ml: international units per milliliter, tg: transgenic, DAPI: 4',6-diamidino-2-phenylindole, p.i.: post injection, AOI: area of interest, DG: dentate gyrus, ML: molecular layer.*

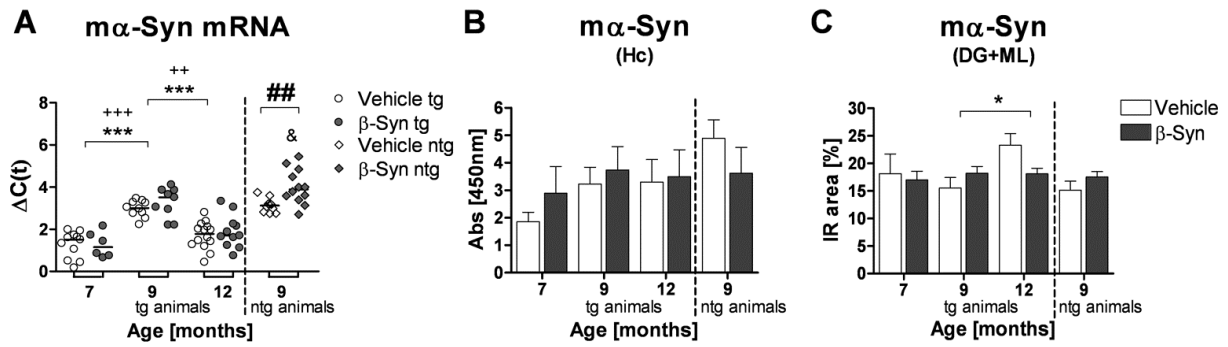

**Figure S2:  $\alpha$ -Synuclein expression in the hippocampus of APP<sub>SL</sub> and ntg mice injected with human  $\beta$ -Syn expressing lentiviral particles.** Murine  $\alpha$ -Syn mRNA expression (**A**) was evaluated with qRT-PCR in the hippocampus (Hc) over age. mRNA levels are shown as difference in cycle numbers ( $\Delta C(t)$ ) between the GOI and the HKG (HPRT1). Vehicle (white dots): n=11-14;  $\beta$ -Syn (grey dots): n=6-12. Scatter dot blot + median. Statistical analysis: 2-way ANOVA with Bonferroni post-test. ++/++p<0.01; \*\*\*/+p<0.001; \* Vehicle vs. Vehicle; +  $\beta$ -Syn vs.  $\beta$ -Syn; # Vehicle vs.  $\beta$ -Syn; &  $\beta$ -Syn ntg vs.  $\beta$ -Syn tg. Hippocampal murine  $\alpha$ -Syn protein levels were evaluated by ELISA (**B**) in the left hemispheres. Histological analysis of the right hemispheres was evaluated region specifically as IR area in percent for ML and DG (**C**). Vehicle (white bars): n=11-14;  $\beta$ -Syn (grey bars): n=6-12. Bars represent group means + SEM. Statistical analysis: 2-way ANOVA with Bonferroni post-test. \*p<0.05; \* Vehicle vs. Vehicle. Abbreviations: tg: transgenic, ntg: non-transgenic, C(t): cycle threshold, GOI: gene of interest, HKG: housekeeping gene, HPRT1: hypoxanthine-guanine phosphoribosyltransferase 1, Hc: hippocampus, ML: molecular layer, DG: dentate gyrus, IR: immunoreactive.

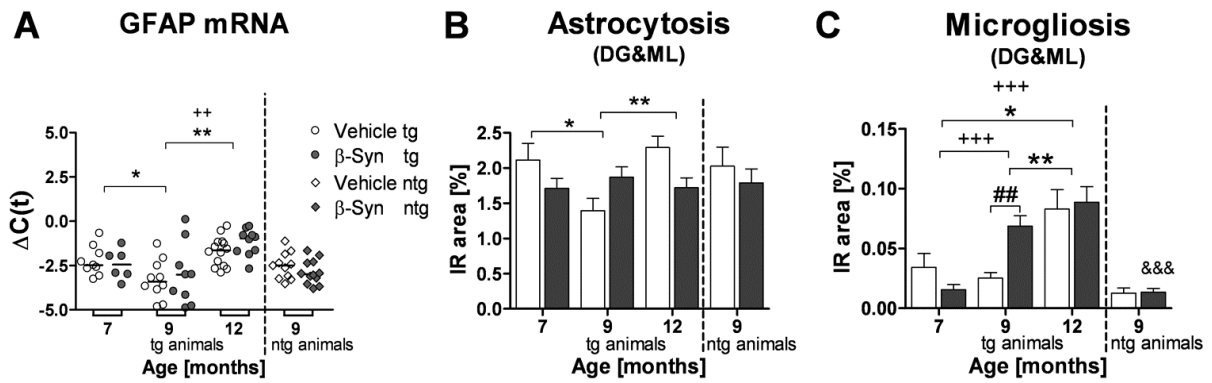

**Figure S3: Hippocampal neuroinflammation in APP<sub>SL</sub> and ntg mice injected with β-Syn expressing lentiviral particles.** Neuroinflammation marker were analyzed on mRNA level in the whole hippocampus (**A**) as well as on protein level in DG and ML (**B,C**). mRNA expression is illustrated as difference in cycle numbers ( $\Delta C(t)$ ) between the GOI and the HKG (HPRT1, **A**). Vehicle (white dots): n=11-14; β-Syn (grey dots): n=6-12. Scatter dot blot + median. Statistical analysis: 2-way ANOVA with Bonferroni post-test. \* $p < 0.05$ ; \*\*/+ $p < 0.01$ ; \* Vehicle vs. Vehicle; + β-Syn vs. β-Syn. Immunohistochemically, astrocytosis was evaluated as IR area in percent with an anti-GFAP (**B**), and microgliosis with an anti-Iba-1 antibody (**C**) over age (7, 9, 12 months). Vehicle (white bars) n=4-6/group; β-Syn (grey bars) n=10/group. Bars represent mean + SEM. Statistical analysis: 2-way ANOVA with Bonferroni post-test. \* $p < 0.05$ ; \*\*/+ $p < 0.01$ ; \* Vehicle vs. Vehicle; + β-Syn vs. β-Syn; # Vehicle vs. β-Syn; & Vehicle/β-Syn ntg vs. Vehicle/β-Syn tg. *Abbreviations: tg: transgenic, ntg: non-transgenic, C(t): cycle threshold, GOI: gene of interest, HKG: housekeeping gene, HPRT1: hypoxanthine-guanine phosphoribosyltransferase 1, Hc: hippocampus, ML: molecular layer, DG: dentate gyrus, GFAP: glial fibrillary acidic protein, Iba1: ionized calcium binding adaptor molecule 1, IR: immunoreactive.*

**A Stable SH-cell lines**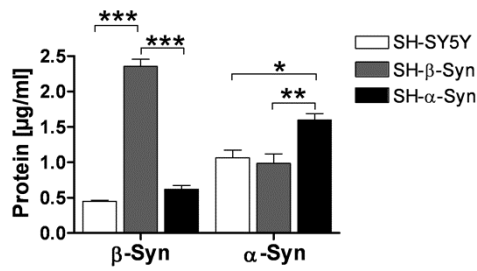**B Infected H4-15x**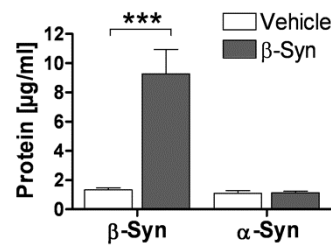

**Figure S4: Synuclein protein expression in stable SH-cell lines and infected hAPP**

**overexpressing cells.**  $\alpha$ - and  $\beta$ -Synuclein protein expression was measured in 2 different cell types *in vitro*: i) Stable human neuroblastoma cell lines overexpressing  $\alpha$ -Syn (SH- $\alpha$ -Syn, black bars) or  $\beta$ -Syn (SH- $\beta$ -Syn, grey bars) or ntg SH (SH-SY5Y, white bars); ii) Human neuroglioma cells overexpressing APP-695 (H4-15x) infected with empty lentiviral particles (Vehicle, white bars) or particles overexpressing  $\beta$ -Syn (grey bars). Synuclein protein concentrations were detected with an ELISA (**A,B**).  $n=6$ /group; Bars represent mean + SEM. Statistical analysis: 1-way ANOVA with Bonferroni post-test (**A**) or T-test (**B**). *Abbreviations:* SH: SH-SY5Y, hAPP: human amyloid precursor protein.
